# Supplementary material for: Effect of thermal annealing on exciton diffusion in a diketopyrrolopyrrole derivative
Source: Royal Society of Chemistry journal article supplement (doi:10.1039/c2cp41359k), 2012-01-01
Supplement: c2cp41359k.pdf [file c2cp41359k.pdf]

## Supporting information

### Effect of Thermal Annealing on Exciton Diffusion in a Diketopyrrolopyrrole

#### Derivative

Oleksandr V. Mikhnenko, Jason Lin, Ying Shu, John E. Anthony,  
Paul W. M. Blom, Thuc-Quyen Nguyen, Maria Antonietta Loi

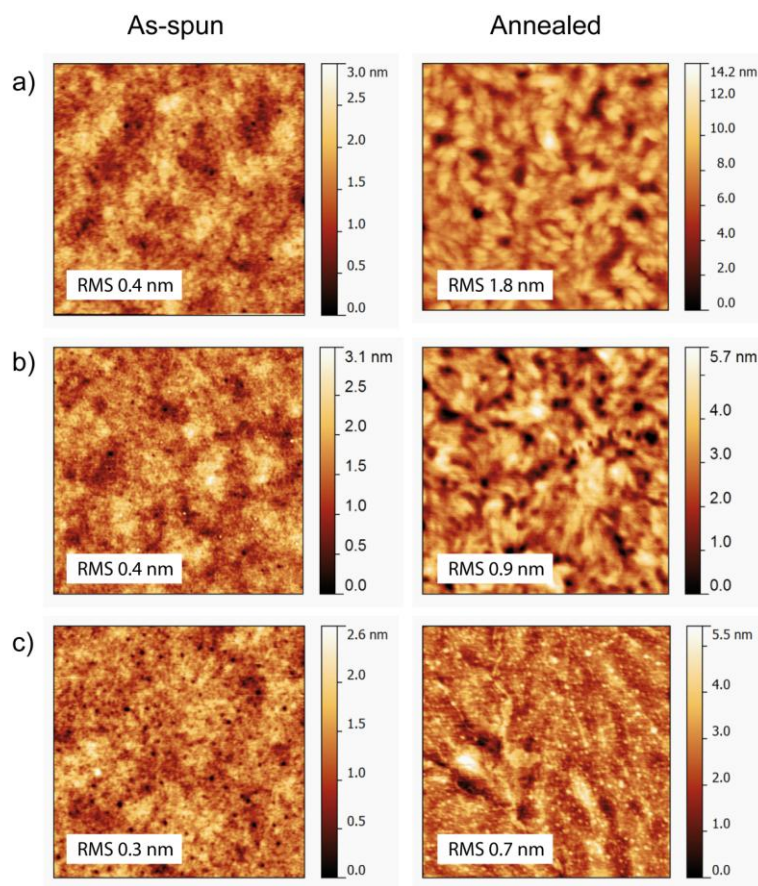

**Figure S1.** Topography images for as spun and annealed films acquired by atomic force microscopy: (a) pristine film of C<sub>6</sub>PT<sub>2</sub>-DPP; (b) 2 wt% blend film of PCBM:C<sub>6</sub>PT<sub>2</sub>-DPP; and (c) 1.4 wt% blend film of diCN-TIPS-Pn:C<sub>6</sub>PT<sub>2</sub>-DPP. All scans are 2 × 2 μm.
